# Supplementary material for: Tissue inhibitor of metalloproteinase-1 (TIMP-1) as a prognostic biomarker in gastrointestinal cancer: a meta-analysis
Source: PeerJ. 2021 Feb 16;9:e10859. doi: 10.7717/peerj.10859 (PMC7894117; doi:10.7717/peerj.10859)
Supplement: Supplemental Information 1 — Hr = hazard ratio; ll = lower confidence limit; ul = upper confidence limit. [file peerj-09-10859-s001.xlsx]

## Sheet: Sheet1
study	year	hr	ll	ul
Joo, Y. E. 1999	1999	1.83	0.53	6.52
Roca, F 2006	2006	2.57	1.01	6.54
Unsal, D 2008	2008	0.64	0.15	2.71
Mroczko, B 2009	2009	4.58	1.86	10.83
Jensen, S. A 2010	2010	1.6	1.1	2.2
Li, X. F 2016	2016	2.64	1.87	5.82
Song, G. 2016	2016	2.91	1.25	6.74
Mads Nikola 2000	2000	2.5	1.7	3.7
M. Holten 2004	2004	2.2	1.2	4.1
Wang, C. S. 2006	2006	1.84	1.13	2.98
Yukawa, N. 2007	2007	2.13	0.93	4.9
Yoshikawa, T. 2009	2009	2.29	1.28	4.09
Giaginis, C. 2009	2009	2.44	1.2	4.98
Birgisson, H. 2010	2010	1.8	1.3	2.4
Aldulaymi, B. 2010	2010	3.8	2.4	6
Frederiksen, C 2011	2011	1.8	1.17	2.78
Bystrom, P. 2012	2012	2.1	1.11	3.94
Oblak, I. 2013	2013	2.15	1.01	4.56
Spindler, K. L 2015	2015	1.83	1.29	2.59
Laitinen, A. 2018	2018	1.85	1.26	2.72
Bockelman, C. 2018	2018	1.8	1.23	2.64
Vocka, M. 2019	2019	1.65	1.07	2.54
