# Supplementary material for: Tissue inhibitor of metalloproteinase-1 (TIMP-1) as a prognostic biomarker in gastrointestinal cancer: a meta-analysis
Source: PeerJ. 2021 Feb 16;9:e10859. doi: 10.7717/peerj.10859 (PMC7894117; doi:10.7717/peerj.10859)
Supplement: Supplemental Information 2 — tevent and cevent: the number of patients with male, T3/T4, N1/N2/N3, M1, High histological grade, Positive vascular invasion in TIMP-1+ group and TIMP-1- group respectively; tnoevent and cnoevent: the number of patients with female, T1/T2, N0, M0, Low histological grade, Negative vascular invasion in TIMP-1+ group and TIMP-1- group respectively. [file peerj-09-10859-s002.xlsx]

## Sheet: Age
First Author	tevent	tnoevent	cevent	cnoevent
Jensen, S. A 2010	33	107	35	150
Song, G. 2016	28	22	23	21
Joo, Y. E. 1999	15	16	12	11

## Sheet: Gender
First Author	tevent	tnoevent	cevent	cnoevent
Jensen, S. A 2010	68	72	94	91
Li, X. F 2016	119	74	88	48
Song, G. 2016	24	26	23	21
Joo, Y. E. 1999	1	30	11	12
Yoshikawa 2009	20	10	83	36
Yukawa 2007	29	16	25	17

## Sheet: T stage
First Author	tevent	tnoevent	cevent	cnoevent
Mroczko, B 2009	37	5	6	6
Jensen, S. A 2010	134	6	178	7
Li, X. F 2016	141	52	86	50
Song, G. 2016	37	23	34	10
Joo, Y. E. 1999	25	6	19	4
Yoshikawa 2009	20	10	35	84

## Sheet: N stage
First Author	tevent	tnoevent	cevent	cnoevent
Roca, F 2006	7	14	10	29
Mroczko, B 2009	33	9	5	7
Song, G. 2016	28	22	15	29
Joo, Y. E. 1999	18	13	7	16
Yoshikawa 2009	22	8	49	70
Yukawa 2007	32	13	19	23

## Sheet: Sheet8
First Author	tevent	tnoevent	cevent	cnoevent
Song, G. 2016	11	39	3	41
Yoshikawa 2009	11	19	7	112
Yukawa 2007	41	4	40	2

## Sheet: TNM stage
First Author	tevent	tnoevent	cevent	cnoevent
Roca, F 2006	12	9	23	16
Mroczko, B 2009	35	7	5	7
Song, G. 2016	33	17	19	25
Joo, Y. E. 1999	19	12	6	17

## Sheet: Histological grade
First Author	tevent	tnoevent	cevent	cnoevent
Roca, F 2006	5	15	7	33
Jensen, S. A 2010	41	99	47	138
Li, X. F 2016	131	62	45	91
Song, G. 2016	10	40	8	36
Joo, Y. E. 1999	7	24	6	17
Yoshikawa 2009	13	17	49	70
Yukawa 2007	29	16	22	20

## Sheet: Vascular invasion
First Author	tevent	tnoevent	cevent	cnoevent
Jensen, S. A 2010	29	71	42	98
Li, X. F 2016	90	103	63	73
Song, G. 2016	8	42	1	43
